## A Tale of Different Populations: Disparities in Obstetric Anesthesia: Erratum

In the October 2019 issue, there are two errors in the Infographics in Anesthesiology image entitled “A Tale of Different Populations: Disparities in Obstetric Anesthesia.” (1) The patient demographic icons and labels “Hispanic” and “African-American” should be switched. (2) “General anesthesia for c-sections, national cohort, 2016” should be “General anesthesia for c-sections, national cohort, 1999–2002,” reflecting the years of the cohort rather than year of publication.

The authors regret the errors. The online version and PDF of the article have been corrected.

DOI: 10.1097/ALN.0000000000003475

### Reference

Wanderer JP, Rathmell JP: A tale of different populations: Disparities in obstetric anesthesia. *ANESTHESIOLOGY* 2019; 131:A23. doi: 10.1097/ALN.0000000000002979

## Instructions for Obtaining Anesthesiology Continuing Medical Education (CME) Credit: Erratum

On the CME pages of the July and August 2020 issues, the *AMA PRA Category 1 Credits*<sup>TM</sup> were incorrectly listed as 1.5. The American Society of Anesthesiologists designated the journal-based activity in both issues for a maximum of 1.0 *AMA PRA Category 1 Credits*<sup>TM</sup>.

The online versions and PDFs have been corrected.

DOI: 10.1097/ALN.0000000000003494

### References

1. Instructions for Obtaining Anesthesiology Continuing Medical Education (CME) Credit. *ANESTHESIOLOGY* 2020; 133:A12. doi: 10.1097/ALN.0000000000003426
2. Instructions for Obtaining Anesthesiology Continuing Medical Education (CME) Credit. *ANESTHESIOLOGY* 2020; 133:A12. doi: 10.1097/ALN.0000000000003457

## Lung Ultrasound in Emergency and Critically Ill Patients: Number of Supervised Exams to Reach Basic Competence: Erratum

In the article “Lung Ultrasound in Emergency and Critically Ill Patients: Number of Supervised Exams to Reach Basic Competence” published in the April 2020 issue, there is an error in the Methods section. In the third paragraph under “Lung Ultrasound Curriculum and the APECHO Study” on page 902, the sentence “... (3) interstitial syndrome, defined as the presence of more than two spaced B lines or coalescent B lines, detected in a limited portion of the intercostal space and issued from the pleural line or subpleural consolidations of at least 5 mm;...” should be replaced by “... (3) interstitial syndrome, defined as the presence of more than two spaced B lines;...”.

The authors regret the error. The online version and PDF of the article have been corrected.

DOI: 10.1097/ALN.0000000000003508

### Reference

Arbelot C, Dexheimer Neto FL, Gao Y, Brisson H, Chunyao W, Lv J, Valente Barbas CS, Perbet S, Prior Caltabellotta F, Gay F, Deransy R, Lima EJS, Cebey A, Monsel A, Neves J, Zhang M, Bin D, An Y, Malbouisson L, Salluh J, Constantin JM, Rouby JJ; APECHO Study Group. Lung ultrasound in emergency and critically ill patients: Number of supervised exams to reach basic competence. *ANESTHESIOLOGY* 2020; 132:899–907. doi: 10.1097/ALN.0000000000003096
